# Supplementary material
Source: MDPI journal article supplement (https://www.mdpi.com/2673-6284/11/4/52)
Supplement: s1 [file s1]

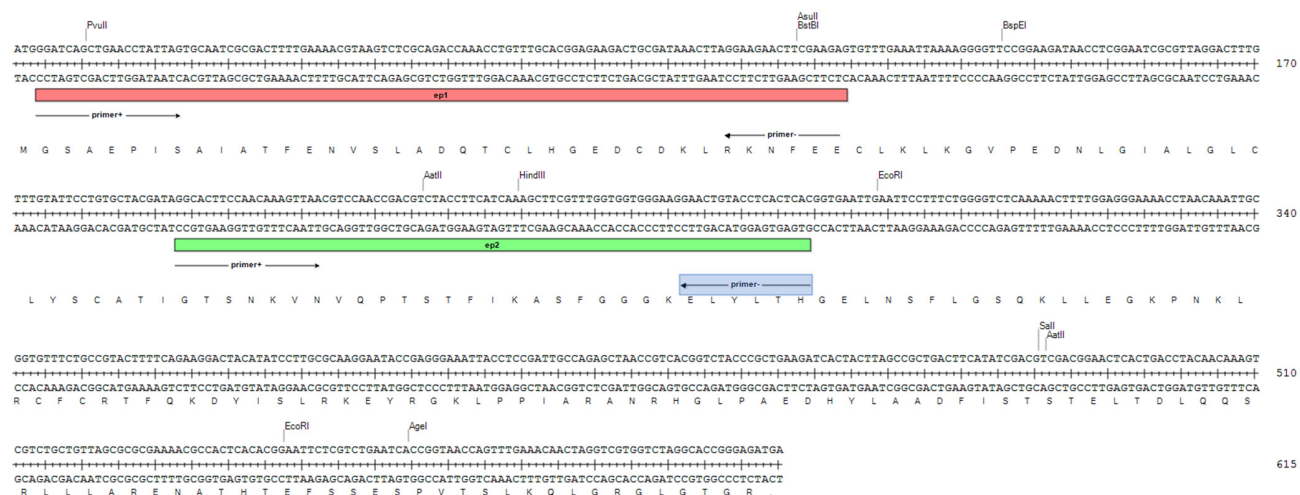

**Figure S1.** Positions of epitopes and primers on the BYV CP sequence. Open reading frame of the beet yellows virus protein p22 and its amino acid sequence. The red box is epitope 1 and the green box is epitope 2, and black arrows indicate primers without restriction sites used to amplify these epitopes. *Escherichia coli* rare codons are: AGG, AGA, CTA, ATA, CGA and CCC. To optimize codons for strong protein expression, we excluded rare codons from our primers. There is one rare codon in epitope 1 (AGG-R) but it located out of the primer sequence.
